# Supplementary material for: pH and reduction-activated polymeric prodrug nanoparticles based on a 6-thioguanine-dialdehyde sodium alginate conjugate for enhanced intracellular drug release in leukemia
Source: Royal Society of Chemistry journal article supplement (doi:10.1039/c8py00577j), 2018-01-01
Supplement: c8py00577j1.pdf [file c8py00577j1.pdf]

## Supporting Information

### pH and reduction-activated polymeric prodrug nanoparticles based on 6-thioguanine-dialdehyde sodium alginate conjugate for enhanced intracellular drug release in leukemia

Yanming Wan, Ying Bu, Jiaming Liu, Jia Yang, Weiquan Cai, Yihua Yin\*, Wenjin

Xu, Peihu Xu, Jingli Zhang\*\* Meng He

Department of Pharmaceutical Engineering, School of Chemistry, Chemical Engineering and Life Science, Wuhan University of Technology, Wuhan 430070, PR China

Corresponding Author

Yihua Yin: +86-027-87749379. Email addresses: yihuayin@aliyun.com

Jingli Zhang: Email addresses: [junniz@163.com](mailto:junniz@163.com)

#### 1.1 Determination of the feed molar ratio of ASA and 6-TG

Dialdehyde alginate consists of oxidized units and non-oxidized uronic acid units. After the degree of oxidation (DO) is determined, the following two equations can be established:

$$W = n_o M_o + n_{no} M_{no} \quad (1)$$

$$\frac{n_o}{n_{no}} = \frac{DO}{1-DO} \quad (2)$$

Where W is the weight of the dialdehyde alginate sample;  $n_o$  and  $n_{no}$  are the molar content of the oxidized units and non-oxidized uronic acid units, respectively.  $M_o$  and  $M_{no}$  represent the molecular weights of the oxidized units and non-oxidized uronic acid units, respectively.  $M_o = 196$  for the oxidized units;  $M_{no} = 198$  for non-oxidized uronic acid units

The solution of the two equations can give the molar content of oxidized units in the sample:

$$n_o = \frac{W}{\left[ M_o + \frac{1-DO}{DO} \times M_{no} \right]}$$

---

\*Corresponding author. Telephone number: +8602787749379. Email addresses: yihuayin@aliyun.com

\*\*Co-corresponding author. Email addresses: [junniz@163.com](mailto:junniz@163.com)

According to the value of  $n_o$ , the feed amount of 6-TG can be determined, and the feed molar ratio of ASA and 6-TG is calculated.

### 1.2. Calculation of the substitution degrees of 6-TG in 6-TG-DSA

$$DS = \frac{n_{6-TG}}{n_o + n_{no}} = \frac{W_{6-TG}}{M_{6-TG}} \times \frac{DO \times Mo + (1 - DO) \times M_{no}}{100 - (W_{6-TG}/M_{6-TG}) \times (167.2 - 2 + 16)}$$

Where  $n_{6-TG}$  is the molar content of 6-TG in 6-TG-DSA;  $W_{6-TG}$  is the content of 6-TG in 6-TG-DSA (mg/100 mg polymer);  $M_{6-TG}$  represents the molecular weight of 6-TG; others are the same as above

### 1.3. Fluorescence characterization of the Schiff base bonds in 6-TG-DSA

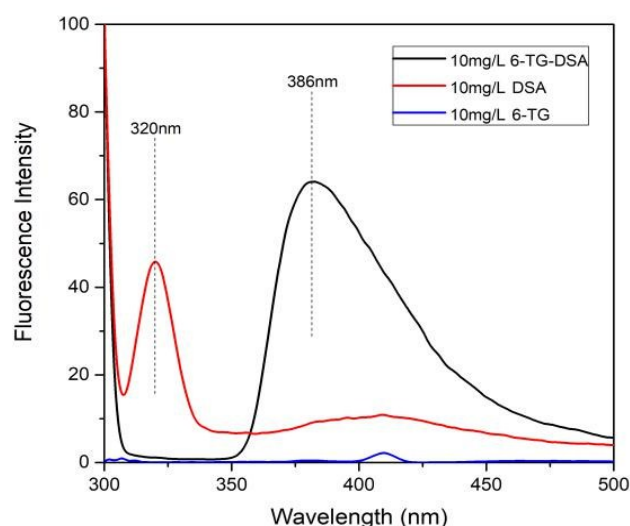

Fig. S1. Fluorescence emission spectra of 6-TG-DSA, DSA and 6-TG excited at 288 nm by laser.

### 1.4. The stability of nanoparticles in the cell culture medium

**Table S1.** The mean diameters and distribution of PPN-3 incubated with cell culture media at different time

| Time (h) | $D_h$ (nm)       | PDI               | $\zeta$ (mV) |
|----------|------------------|-------------------|--------------|
| 0        | $119.6 \pm 0.14$ | $0.075 \pm 0.011$ | -29.2        |
| 24       | $125.8 \pm 0.18$ | $0.084 \pm 0.014$ | -28.8        |
| 48       | $130.2 \pm 0.22$ | $0.095 \pm 0.019$ | -25.2        |

### 1.5. TEM images of PPN

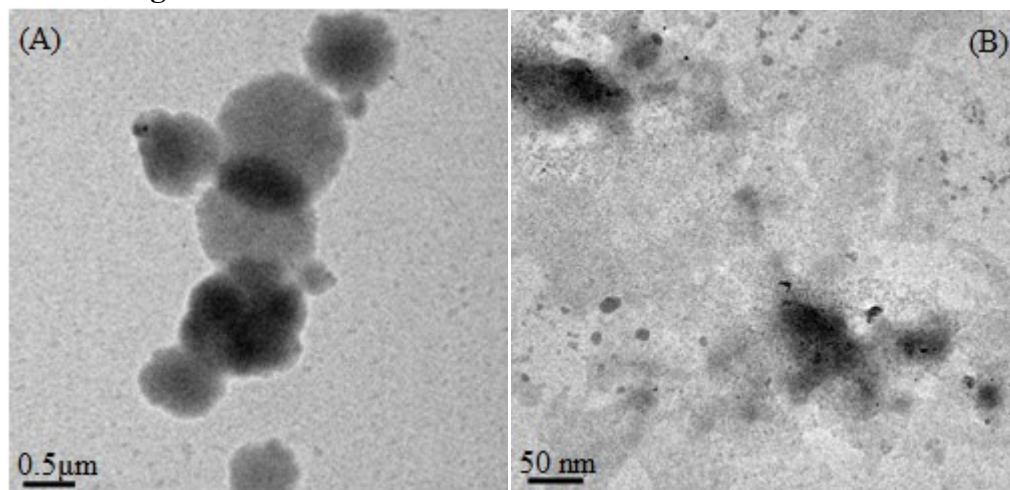

Fig. S2. TEM images of PPN at pH 7.4 with 10 mM GSH (A) and at pH 5.0 with 20 mM GSH (B).

### 1.6. Fluorescence characterization of the acid hydrolysis of Schiff base bonds in 6-TG-DSA

To confirm the acid hydrolysis of Schiff base bonds, 6-TG-DSA was dissolved in acetic acid solution at pH 5.0 to a concentration of 10 mg/L, and then used for determination of the change of the fluorescence emission intensity over time. As shown in Fig. S3, the fluorescence emission intensity of 6-TG-DSA at 386 nm decreased with time, almost completely disappeared at 5 h, indicating the complete hydrolysis of Schiff base bonds (HC=N) in 6-TG-DSA.

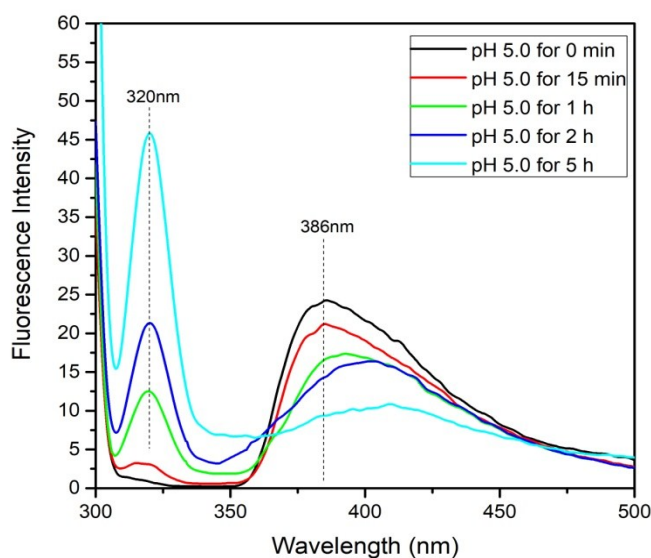

Fig. S3. Fluorescence emission spectra ( $\lambda_{\text{ex}} = 386 \text{ nm}$ ) of 6-TG-DSA (10 mg/L) in acetic acid solution at pH 5.0 for 5h.
